# Supplementary material for: Alcohol consumption and binge drinking in early pregnancy. A cross-sectional study with data from the Copenhagen Pregnancy Cohort
Source: Springer Nature journal article supplement (doi:10.1186/s12884-015-0757-z), 2015-12-01
Supplement: MOESM1 [file 9743604]

**Information sheet 1**

This schedule was completed on date: \_\_\_\_/\_\_\_\_-\_\_\_\_

**Personal information**

First name(s): \_\_\_\_\_ Surname: \_\_\_\_\_

Civil registration number (cpr): \_\_\_\_\_

Provide 1 or 2 contact numbers:

Telephone number 1: \_\_\_\_\_ Telephone number 2: \_\_\_\_\_

E-mail: \_\_\_\_\_@\_\_\_\_\_

 Are you living with a parent/spouse?      No       Yes 

 What is your current civil status? (*Only tick off once*)

 Married       Single       Divorced       Widowed       Separated       Civil Partnership 
**Information**

 4.1. Can you read and understand Danish?      Yes       No 

 4.2. Do you need an interpreter?      Yes       No 

4.3. What is your nationality?: \_\_\_\_\_

4.4. What is your native language? (indicate several if necessary): \_\_\_\_\_

 4.5. Do you have special needs/concerns, i.e. problems with walking, with your vision or hearing, emotional or other issues      Yes       No 

4.6. If yes, please indicate: \_\_\_\_\_

 4.7. Are you in contact with your municipal case officer?      Yes       No 

4.8. If yes, why? \_\_\_\_\_

**This pregnancy**

 5.1. Has your delivery date been determined through scanning?      Yes       No 

5.2. If yes, what is the due date from ultrasound scanning: \_\_\_\_/\_\_\_\_-\_\_\_\_

5.3. How long did it take you to become pregnant this time?

Years: \_\_\_\_\_ Months: \_\_\_\_\_

 5.4. I did not intentionally become pregnant

5.5. In connection with this pregnancy, did you receive infertility treatment e.g. hormones, IVF, ICSI, insemination or operation? Yes  No

5.6. If yes, which treatment?

- In vitro-fertilisation/IVF
- ICSI
- Insemination
- Hormone treatment/stimulation
- Sperm donation
- Operation
- Treatment with frozen eggs

5.13. How planned is your current pregnancy? (*Only tick off once*)

- Very well planned
- Fairly well planned
- Neither planned nor planned
- Fairly unplanned
- Totally unplanned

### Previous pregnancies

6.1. Have you been pregnant before (including miscarriages)? Yes  No

*If no, go to question 9.1.*

If you have been pregnant before, when and how did your pregnancy(cies) end? (*Please only tick off once in every line*)

|    | Year | Birth            |                |                   | Miscarriage              |                          | Ectopic pregnancy |
|----|------|------------------|----------------|-------------------|--------------------------|--------------------------|-------------------|
|    |      | Delivery 1 child | Delivery twins | Delivery triplets | 0-3 <sup>rd</sup> months | 4-6 <sup>th</sup> months |                   |
| 1. |      |                  |                |                   |                          |                          |                   |
| 2. |      |                  |                |                   |                          |                          |                   |
| 3. |      |                  |                |                   |                          |                          |                   |
| 4. |      |                  |                |                   |                          |                          |                   |
| 5. |      |                  |                |                   |                          |                          |                   |
| 6. |      |                  |                |                   |                          |                          |                   |

## Previous births

7.1. Previous deliveries (If you gave birth to twins or triplets please fill out a line for each child)

|    | Year +<br>Place of<br>birth | Live birth                                               | Sex                                                           | Birth<br>weight in<br>grams | More than 3<br>weeks<br>premature                        | Caesarean<br>section                                     | Healthy/<br>normal<br>development                        |
|----|-----------------------------|----------------------------------------------------------|---------------------------------------------------------------|-----------------------------|----------------------------------------------------------|----------------------------------------------------------|----------------------------------------------------------|
| 1. |                             | Yes <input type="checkbox"/> No <input type="checkbox"/> | Boy <input type="checkbox"/><br>Girl <input type="checkbox"/> |                             | Yes <input type="checkbox"/> No <input type="checkbox"/> | Yes <input type="checkbox"/> No <input type="checkbox"/> | Yes <input type="checkbox"/> No <input type="checkbox"/> |
| 2. |                             | Yes <input type="checkbox"/> No <input type="checkbox"/> | Boy <input type="checkbox"/><br>Girl <input type="checkbox"/> |                             | Yes <input type="checkbox"/> No <input type="checkbox"/> | Yes <input type="checkbox"/> No <input type="checkbox"/> | Yes <input type="checkbox"/> No <input type="checkbox"/> |
| 3. |                             | Yes <input type="checkbox"/> No <input type="checkbox"/> | Boy <input type="checkbox"/><br>Girl <input type="checkbox"/> |                             | Yes <input type="checkbox"/> No <input type="checkbox"/> | Yes <input type="checkbox"/> No <input type="checkbox"/> | Yes <input type="checkbox"/> No <input type="checkbox"/> |
| 4. |                             | Yes <input type="checkbox"/> No <input type="checkbox"/> | Boy <input type="checkbox"/><br>Girl <input type="checkbox"/> |                             | Yes <input type="checkbox"/> No <input type="checkbox"/> | Yes <input type="checkbox"/> No <input type="checkbox"/> | Yes <input type="checkbox"/> No <input type="checkbox"/> |
| 5. |                             | Yes <input type="checkbox"/> No <input type="checkbox"/> | Boy <input type="checkbox"/><br>Girl <input type="checkbox"/> |                             | Yes <input type="checkbox"/> No <input type="checkbox"/> | Yes <input type="checkbox"/> No <input type="checkbox"/> | Yes <input type="checkbox"/> No <input type="checkbox"/> |
| 6. |                             | Yes <input type="checkbox"/> No <input type="checkbox"/> | Boy <input type="checkbox"/><br>Girl <input type="checkbox"/> |                             | Yes <input type="checkbox"/> No <input type="checkbox"/> | Yes <input type="checkbox"/> No <input type="checkbox"/> | Yes <input type="checkbox"/> No <input type="checkbox"/> |

## Previous pregnancies and births – complications or illness

Did you ever rupture your sphincter anus in connection with giving birth?

Yes  No

Have you been diagnosed with pelvic girdle syndrome by a doctor or physiotherapist in a previous pregnancy?

Yes  No

Please indicate whether you have had problems or diseases in a previous pregnancy, birth or postpartum period:

---



---



---

## Your health

How would you assess your general state of health before your pregnancy? (*Only tick off once*)

Really good       Good       Alright       Poor       Very poor

Did you have any of the following conditions/diseases when you became pregnant? (*Tick as many as required*)

- Yes, high blood pressure
- Yes, lung disease      Which is: \_\_\_\_\_
- Yes, diabetes type 1
- Yes, diabetes type 2
- Yes, metabolic disorder      Which is: \_\_\_\_\_
- Yes, kidney disease      Which is: \_\_\_\_\_
- Yes, epilepsy
- Yes, arthritis      Which is: \_\_\_\_\_
- Yes, mental illness      Which is: \_\_\_\_\_
- Yes, heart disease      Which is: \_\_\_\_\_
- Other disease      Which is: \_\_\_\_\_
- No, I did not suffer from any diseases

Have you ever consulted a psychologist?      Yes       No

Have you ever consulted a psychiatrist?      Yes       No

Have you had an operation?      No       Yes

If yes, when (year): \_\_\_\_\_

What was the operation for: \_\_\_\_\_

---

Does anyone in your family have diabetes (diabetes type 1)?      No       Yes

If yes, please specify who: (*Tick as many as required*)

- a.  Yes, parents
- b.  Yes, grand parents
- c.  Yes, siblings
- d.  Yes, children

Does anyone in your family have diabetes (diabetes type 2)?      No       Yes

If yes, please specify who: (*Tick as many as required*)

- a.  Yes, parents
- b.  Yes, grandparents
- c.  Yes, siblings

d.  Yes, children

Did you take any medicine (including pain relieving medicine) within the last three months before pregnancy?

No  Yes

If yes, please specify which medicine:

|    | Type of medicine | Frequency                      |                                           |                                 |
|----|------------------|--------------------------------|-------------------------------------------|---------------------------------|
| a. |                  | <input type="checkbox"/> Daily | <input type="checkbox"/> 1-2 times a week | <input type="checkbox"/> Rarely |
| b. |                  | <input type="checkbox"/> Daily | <input type="checkbox"/> 1-2 times a week | <input type="checkbox"/> Rarely |
| c. |                  | <input type="checkbox"/> Daily | <input type="checkbox"/> 1-2 times a week | <input type="checkbox"/> Rarely |

Do you take any medicine (including pain relieving medicine) now, during your pregnancy?

No  Yes

If yes: please specify which medicine:

|    | Type of medicine | Frequency                      |                                           |                                 |
|----|------------------|--------------------------------|-------------------------------------------|---------------------------------|
| a. |                  | <input type="checkbox"/> Daily | <input type="checkbox"/> 1-2 times a week | <input type="checkbox"/> Rarely |
| b. |                  | <input type="checkbox"/> Daily | <input type="checkbox"/> 1-2 times a week | <input type="checkbox"/> Rarely |
| c. |                  | <input type="checkbox"/> Daily | <input type="checkbox"/> 1-2 times a week | <input type="checkbox"/> Rarely |

## Well-being

### The following questions concern your well-being during the last two weeks

For each of the five statements below, please tick the number which is closest to how you have been feeling during the last two weeks. Note that higher numbers mean better well-being.

Example: If you have felt happy and in good spirits **more than half of the time** during the last two weeks, then tick the box with the number 3.

| “Over the last two weeks...”                               | All the time | Most of the time | More than half the time | Less than half the time | Some of the time | At no time |
|------------------------------------------------------------|--------------|------------------|-------------------------|-------------------------|------------------|------------|
| I have felt cheerful and in good spirits                   | 5            | 4                | 3                       | 2                       | 1                | 0          |
| I have felt calm and relaxed                               | 5            | 4                | 3                       | 2                       | 1                | 0          |
| I have felt active and vigorous                            | 5            | 4                | 3                       | 2                       | 1                | 0          |
| I woke up feeling fresh and rested                         | 5            | 4                | 3                       | 2                       | 1                | 0          |
| My daily life has been filled with things that interest me | 5            | 4                | 3                       | 2                       | 1                | 0          |

## Weight and height

What did you weigh before you became pregnant?: \_\_\_\_\_ kilos

What is your current weight?: \_\_\_\_\_ kilos

What is your height?: \_\_\_\_\_ cm

## Smoking

Did you smoke before you became pregnant?

Yes  go to 12.2 No  go to 12.3

12.2. If yes, how much did you smoke on a daily basis? \_\_\_\_\_ (cigarettes)

12.3. Did you smoke prior to your pregnancy? (*Only tick off once*)

I have never smoked

I stopped smoking because I was planning this pregnancy

I stopped smoking long before I planned this pregnancy

Are you a smoker no?

Yes

No

If yes, how much do you smoke on a daily basis? \_\_\_\_\_(cigarettes)

Did your partner or spouse smoke when you became pregnant? Yes  No

Does your partner or spouse smoke now? Yes  No

### Alcohol consumption

How many units of alcohol (one unit corresponds to 1 beer, 1 glass of wine or 4 cl. of spirits) did you consume per week before you became pregnant? \_\_\_\_\_ (Number of units)

Approximately how many units of alcohol (one unit corresponds to 1 beer, 1 glass of wine or 4 cl. of spirits) do you drink per week during your pregnancies? \_\_\_\_\_ (Number of units)

*The following question concerns your entire pregnancy, including the first weeks when you were unaware that you were pregnant.*

How many times did you drink 5 or more units of alcohol on a single occasion?

Number of times: \_\_\_\_\_

Do not remember/do not know

### Other intoxicants

*(Tick one box for each question)*

14.1. Did you smoke hash during the year prior to your pregnancy? Yes  No

14.2. Do you smoke hash now? Yes  No

14.3. Did you take sedatives during the year prior to your pregnancy? Yes  No

14.4. Do you take sedatives now? Yes  No

14.5. Did you use narcotics (heroin, morphine, ketogan) during the year prior to your pregnancy? Yes  No

14.6. Do you use narcotics (heroin, morphine, ketogan) now? Yes  No

14.7. Did you use amphetamine, speed, ecstasy or other drugs during the year prior to your pregnancy? Yes  No

14.8. Do you use amphetamine, speed ecstasy or other drugs now? Yes  No

14.9. Did you use cocaine during the year prior to your pregnancy? Yes  No

14.10. Do you use cocaine now? Yes  No

## Food supplements

Did you take a daily vitamin D tablet at the time you became pregnant? Yes  No

If yes, which dosis per day \_\_\_\_\_

Do you take a daily vitamin D tablet now? Yes  No

If yes, which dosis per day \_\_\_\_\_

Did you take folic acid daily at the time you became pregnant? Yes  No

Do you take folic acid daily now? Yes  No

Did you take daily multivitamins for pregnant women at the time you became pregnant? Yes  No

Do you take a daily vitamin D tablet now? Yes  No

Do you currently take a daily iron supplement of at least 40-50 mg? Yes  No

Do you drink milk/consume milk products every day? Yes  No

## Exercise habits

Did you exercise before you became pregnant? Yes  No

If yes, please indicate type of exercise and hours per week:

20.2.  Running:  (hours/week)

20.3.  Strength training:  (hours/week)

20.4.  Yoga:  (hours/week)

20.5.  Cycling, including cycling to work:  (hours/week)

20.6.  Brisk walking:  (hours/week)

20.7.  Spinning:  (hours/week)

20.8.  Fitness:  (hours/week)

20.9.  Swimming:  (hours/week)

20.10.  Aquatic exercise  (hours/week)

20.11.  Horseback riding  (hours/week)

20.12.  Other type of exercise  (hours/week)

If other, please indicate: \_\_\_\_\_



Are you currently exercising? Yes  No

If yes, please indicate type of exercise and hours per week:

- 20.15.  Running:  (hours/week)
- 20.16.  Strength training:  (hours/week)
- 20.17.  Yoga:  (hours/week)
- 20.18.  Cycling, including cycling to work:  (hours/week)
- 20.19.  Brisk walking:  (hours/week)
- 20.20.  Spinning:  (hours/week)
- 20.21.  Fitness:  (hours/week)
- 20.22.  Swimming:  (hours/week)
- 20.23.  Aquatic exercise  (hours/week)
- 20.24.  Horseback riding  (hours/week)
- 20.25.  Other type of exercise  (hours/week)

If other, please indicate: \_\_\_\_\_

### Worry during pregnancy

The following are issues that may cause worry during pregnancy. Many pregnant women experience worry. We wish to know if you are worried about any of the following issues. For each of the them, please tick the number that corresponds to the current level of your worry (one tick per line).

|                                                      | Not a worry |   |   |   |   | Major worry |
|------------------------------------------------------|-------------|---|---|---|---|-------------|
|                                                      | 0           | 1 | 2 | 3 | 4 | 5           |
| 21.1. Your housing                                   |             |   |   |   |   |             |
| 21.2. Money problems                                 |             |   |   |   |   |             |
| 21.3. Your relationship with your husband/partner    |             |   |   |   |   |             |
| 21.4. Your relationship with your family and friends |             |   |   |   |   |             |
| 21.5. Your own health                                |             |   |   |   |   |             |
| 21.6. The health of someone close to                 |             |   |   |   |   |             |

|                                                                 |  |  |  |  |  |  |
|-----------------------------------------------------------------|--|--|--|--|--|--|
| you                                                             |  |  |  |  |  |  |
| 21.7. Employment problems                                       |  |  |  |  |  |  |
| 21.8. The possibility of something being wrong with the baby    |  |  |  |  |  |  |
| 21.9. Going to hospital                                         |  |  |  |  |  |  |
| 21.10. Internal examinations                                    |  |  |  |  |  |  |
| 21.11. Giving birth                                             |  |  |  |  |  |  |
| 21.12. Coping with the new baby                                 |  |  |  |  |  |  |
| 21.13. Giving up work                                           |  |  |  |  |  |  |
| 21.14. Whether your partner will be there for you for the birth |  |  |  |  |  |  |
| 21.15. The possibility that the birth starts too early          |  |  |  |  |  |  |
| 21.16. The possibility of miscarriage                           |  |  |  |  |  |  |

21.17. Do you have other worries? No  Yes

21.18 If yes, please describe which: \_\_\_\_\_

---



---

### Education and employment status

At what level did you complete your education? (*Only tick off once*)

7th-9<sup>th</sup> grade.....

10<sup>th</sup>-11<sup>th</sup> grade.....

Baccalaureate (including HF, HTX, HHX).....

What educational training did you complete?

None.....

Technical degree.....

- Short degree (1-2 years).....
- Intermediate degree (3-4 years).....
- Higher academic degree.....

What is your current employment status?

- Employed.....
- Unemployed.....
- Housewife.....
- On pension.....
- On welfare.....
- Student.....
- Maternity leave.....
- Other.....

If other, please indicate: \_\_\_\_\_

What is/was your job? (Give a precise indication, e.g. 'hospital laboratory technician' not just 'technician'; 'primary school teacher' not just 'teacher' etc.): \_\_\_\_\_

How long is your working week? \_\_\_\_\_ (hours)

What hours do you work?

- Between 7 a.m. and 5 p.m. ....
- Early mornings.....
- Evenings.....
- Nights.....
- Shift work.....

### **Work absence / Working conditions**

Have you been absent from work due to illness or for other reasons during this pregnancy?

No  Yes

If yes, please indicate the reason (*tick several as required*):

Because of pregnancy-related discomfort/complications

If yes, which?: \_\_\_\_\_

Number of days absent to date: \_\_\_\_\_

Because of non-pregnancy related illness

If yes, which?: \_\_\_\_\_

Numbers of days absent to date: \_\_\_\_\_

Because of working environment

If yes, why : \_\_\_\_\_

Numbers of days absent to date: \_\_\_\_\_

For other reasons

### **Multiresistant bacteria**

To minimize the risk of infecting hospitalized patients or children, we kindly ask you to answer the following questions. Methicillin-resistant Staphylococcus aureus (MRSA) is a type of bacteria you can carry without being affected by them. If you have been exposed to the risk of infection, a simple examination can determine whether you are carrying these bacteria on your skin.

Have you been employed, hospitalized or had examinations/treatment in a hospital outside Denmark within the past year?: No  Yes  Don't know

Have you ever had MRSA (Methicillin resistant Staphylococcus aureus)? No  Yes  Don't know

Has anyone in your nearest family had MRSA? No  Yes  Don't know

Have any of your family ever been hospitalised in a department where there was MRSA (Methicillin resistant Staphylococcus aureus)? No  Yes  Don't know

### **This pregnancy**

Please describe your thoughts and wishes for this pregnancy:

---



---



---



---

Thank you for completing and returning the information sheet. This will help us to give you better advice and guidance on your pregnancy, delivery and post partum period.

Kind regards

Midwives and obstetricians at Rigshospitalet
